# Supplementary material for: ACA-28, an ERK MAPK Signaling Modulator, Exerts Anticancer Activity through ROS Induction in Melanoma and Pancreatic Cancer Cells
Source: Hindawi journal article supplement (doi:10.1155/2024/7683793), 2024-03-11

## Supplemental Information

**ACA-28, an ERK MAPK signaling modulator, exerts anticancer activity through ROS induction in melanoma and pancreatic cancer cells.**

**Teruaki Takasaki,<sup>1</sup> Yasuyuki Hamabe,<sup>1</sup> Kenta Touchi,<sup>1</sup> Golam Iftakhar Khandakar,<sup>1</sup> Takeshi Ueda,<sup>2,5</sup> Hitoshi Okada,<sup>2,5</sup> Kazuko Sakai,<sup>3</sup> Kazuto Nishio,<sup>3</sup> Genzo Tanabe,<sup>4</sup> and Reiko Sugiura<sup>1,5</sup>**

<sup>1</sup> Laboratory of Molecular Pharmacogenomics, Department of Pharmaceutical Sciences, Faculty of Pharmacy, Kindai University, Osaka 577-8502, Japan

<sup>2</sup> Department of Biochemistry, Kindai University Faculty of Medicine, Osaka 589-8511, Japan

<sup>3</sup> Department of Genome Biology, Kindai University Faculty of Medicine, Osaka 589-8511, Japan

<sup>4</sup> Laboratory of Organic Chemistry, Department of Pharmacy, Faculty of Pharmacy, Kindai University, Osaka 577-8502, Japan

<sup>5</sup> Anti-Aging Center, Kindai University, Osaka 577-8502, Japan

\*To whom correspondence should be addressed:

TEL: +81-6-4307-3642; FAX: +81-6-6730-1394, E-mail: [sugiurar@phar.kindai.ac.jp](mailto:sugiurar@phar.kindai.ac.jp)

# Supplementary Figure 1

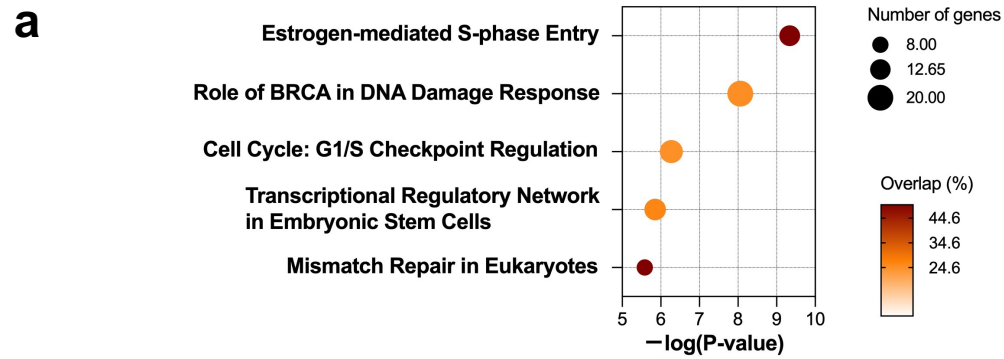

**b**

| Gene symbol        | Description                                          | Binding consensus for NRF2    |
|--------------------|------------------------------------------------------|-------------------------------|
| KRTAP2-3 /KRTAP2-4 | keratin associated protein                           | TGCCTCAGCA-118 TGCCTCAGCA-128 |
| HSPA1A /HSPA1B     | heat shock 70kDa protein                             | TGGCTCAGAA-58 TGGCTCAGAA-57   |
| ZFAND2A            | zinc finger AN1-type containing 2A                   | TGACCCAGCA-203                |
| GADD45B            | growth arrest and DNA damage inducible beta          | TGACTTACA-495                 |
| FOSB               | AP-1 transcription factor subunit                    | TGTCTCCGGG-917                |
| ANKRD1             | ankyrin repeat domain 1                              | TGTCTCTGCC-653                |
| CXCL8              | C-X-C motif chemokine ligand 8                       | TGACTCAGGT-130                |
| EGR1               | early growth response 1                              | TGGCCCGGCC-334                |
| GEM                | GTP binding protein overexpressed in skeletal muscle | AGCCTCAGCA-681 TGCCACTGCA-440 |
| KRTAP4-12          | keratin associated protein 4-12                      | GTTCTCAGCA-34                 |

## Supplementary Figure 2

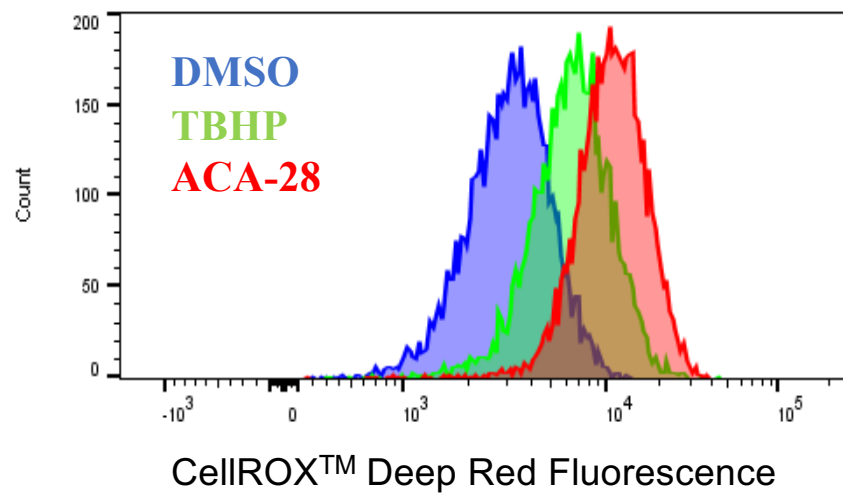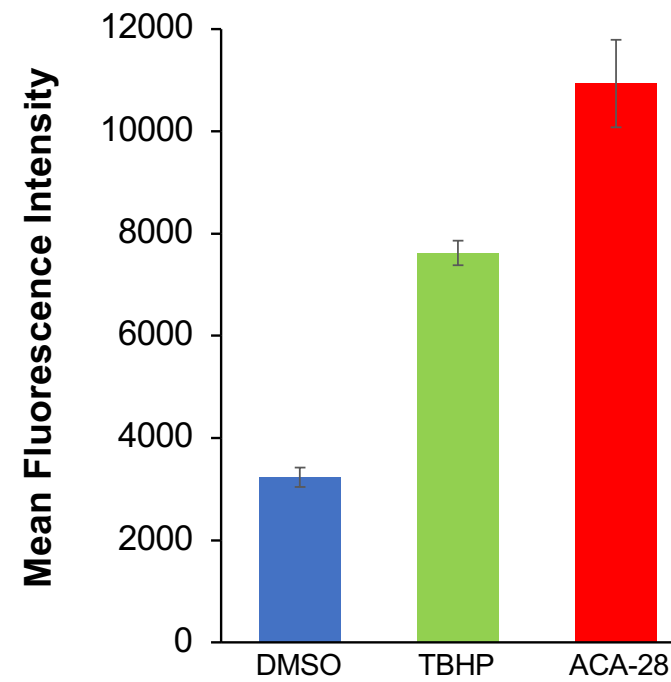

Supplementary Figure 3

**a**

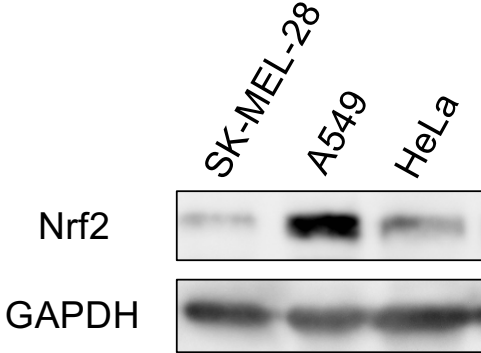

**b**

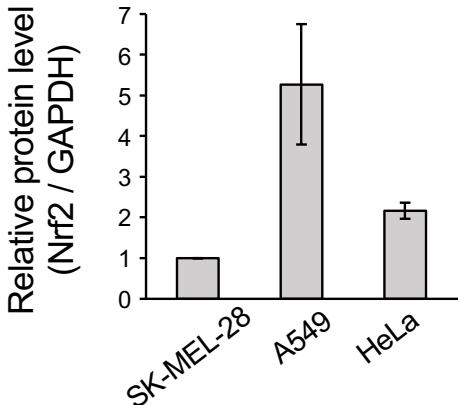

Supplementary Figure 4

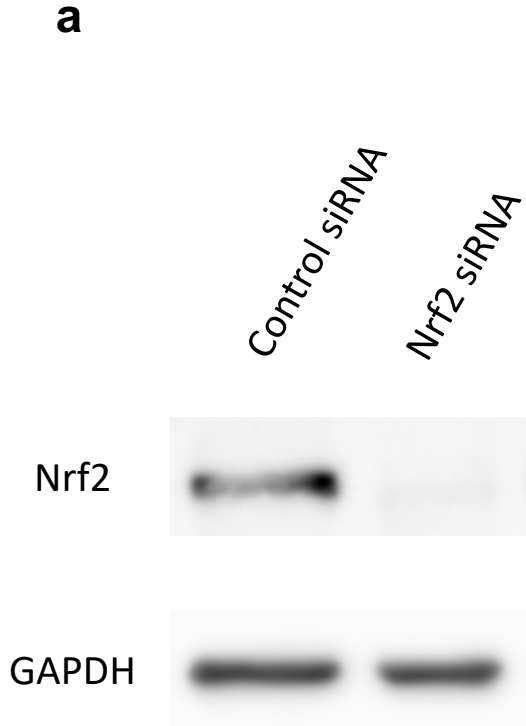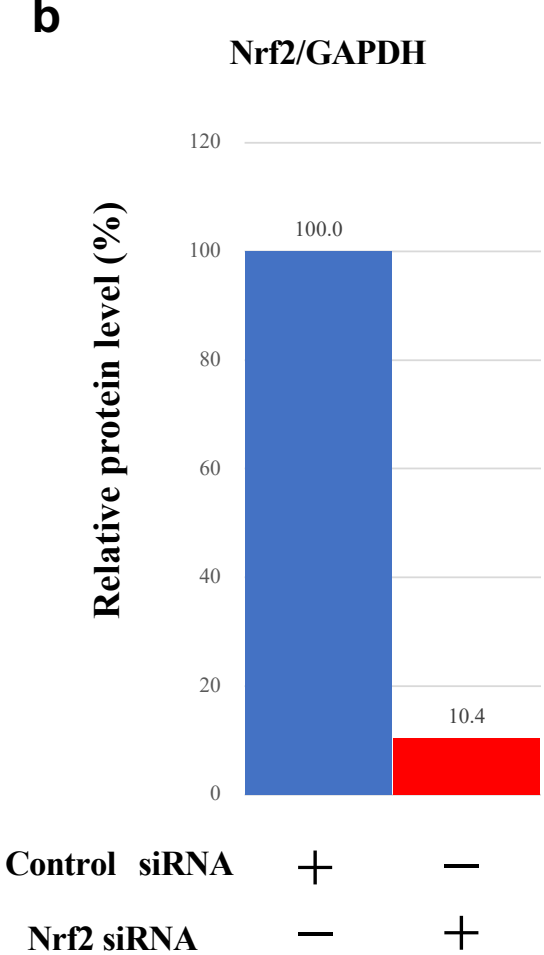

Supplement: f1 [file 7683793.f1.pdf]
